# Supplementary material for: Formation and decay of negative ion states up to 11 eV above the ionization energy of the nanofabrication precursor HFeCo3(CO)12
Source: Royal Society of Chemistry journal article supplement (doi:10.1039/c7sc01927k), 2017-01-01
Supplement: c7sc01927k1.pdf [file c7sc01927k1.pdf]

## Electronic supplementary Information for:

### **Formation and decay of negative ion states up to 11 eV above the ionization energy of the nanofabrication precursor $\text{HFeCo}_3(\text{CO})_{12}$**

Ragesh Kumar T. P, Ragnar Bjornsson, Sven Barth and Oddur Ingólfsson

#### Experimental details

Experiments were conducted in a previously described crossed electron/molecular beam instrument<sup>1</sup>. In brief, an electron beam (~110 meV resolution) is generated with a trochoidal electron monochromator and crossed with an effusive beam of  $\text{HFeCo}_3(\text{CO})_{12}$  supplied through a capillary tube by sublimation at 348-353 K. The electron energy is scanned by ramping the acceleration voltage of the monochromatic electron beam, and the energy scale is calibrated using the  $\text{SF}_6^-$  signal from  $\text{SF}_6$  at 0 eV. Negative ions formed in the interaction zone are extracted by a weak electric field and analyzed with a quadrupole mass spectrometer in perpendicular arrangement to both the electron and molecular beams. The mass spectrometer is set to allow the transmission of the fixed m/z ratio for each negative ion and the electron acceleration voltage is scanned through the relevant energy range to record the respective ion yield curves. All experiments were carried out at a target pressure of about  $4 \times 10^{-7}$  mbar.

#### Synthesis of $\text{HFeCo}_3(\text{CO})_{12}$

The synthesis was carried out using a procedure slightly modified from the one described by Chini *et al.*<sup>2</sup> All handling and synthesis procedures were carried out under an inert atmosphere using Schlenk and glove box techniques to prevent oxidation.  $\text{Co}_2(\text{CO})_8$ ,  $\text{Fe}(\text{CO})_5$ , HCl and acetone were purchased from Sigma Aldrich. Solvents were degassed before use.

In a typical synthesis, 0.50 g (2.6 mmol)  $\text{Fe}(\text{CO})_5$  and 1.51 g (4.4 mmol)  $\text{Co}_2(\text{CO})_8$  were combined in a three-neck flask and 4.8 ml acetone were added drop wise. After stirring this dark solution at 40 °C for 2 h the temperature was increased to 60 °C for 12 h. All volatile components were removed under reduced pressure ( $2 \times 10^{-2}$  mbar; 25 °C) and collected in a cooling trap (liquid  $\text{N}_2$ ). The dark solid residue was dissolved in 10 ml degassed water and filtered in 15 ml HCl conc. (37%), while the yield could be increased by using 5 ml degassed water to transfer the rest of the complex from the filter in the hydrochloric acid. The mixture of the precipitated raw product and HCl was stirred for 1 h at room temperature before the dark purple raw product was separated from the acidic solution via filtration and dried overnight under reduced pressure. Dark purple needles of  $\text{HFeCo}_3(\text{CO})_{12}$  were obtained after recrystallization from toluene. Finally, the final product was kept under dynamic vacuum ( $\sim 10^{-3}$  mbar; 25 °C) for 2 h to remove toluene adhering to the crystalline solid.

#### Computational details

Molecular orbital diagrams were calculated with density functional theory using the functional BP86<sup>3, 4</sup> and the polarized triple-zeta basis set def2-TZVP<sup>5</sup> using the ORCA quantum chemistry code, version 3.0.3<sup>6</sup>.

## Electronic supplementary figures

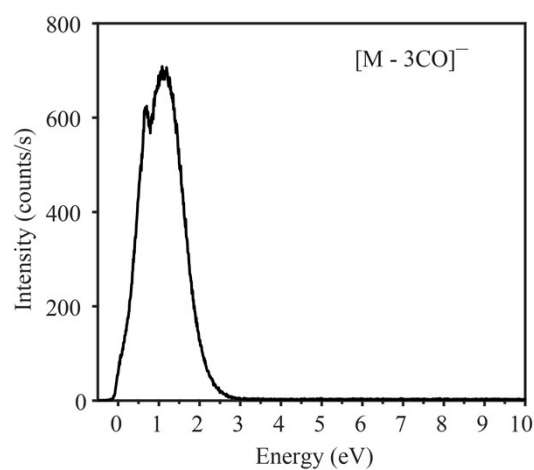

ESI 1. Negative ion yield curve for the formation of  $[M - 3CO]^-$ , here M is the neutral molecule  $HFeCo_3(CO)_{12}$ .

### ESI References

1. E. H. Bjarnason, B. Ómarsson, S. Engmann, F. H. Ómarsson and O. Ingólfsson, *EPJ D*, 2014, **68**, 121.
2. P. Chini, L. Colli and M. Peraldo, *Gazz. Chim. Ital*, 1960, **90**, 1005-1019.
3. A. D. Becke, *Phys. Rev. A*, 1988, **38**, 3098-3100.
4. J. P. Perdew, *Phys. Rev. B*, 1986, **33**, 8822-8824.
5. F. Weigend and R. Ahlrichs, *Phys. Chem. Chem. Phys.*, 2005, **7**, 3297-3305.
6. F. Neese, *Wiley Interdiscip. Rev. Comput. Mol. Sci.*, 2012, **2**, 73-78.
